1           **Electrical Potentials of Protoscoleces of the Cestode**

2                               ***Echinococcus granulosus*** from Bovine Origin

3  
4  
5                               Mónica P. A. Carabajal, Marcos A. Durán, Santiago Olivera,

6                               María José Fernández Salom, and Horacio F. Cantiello

7  
8           Laboratorio de Canales Iónicos, Instituto Multidisciplinario de Salud, Tecnología y  
9           Desarrollo (IMSaTeD, CONICET-UNSE), Santiago del Estero, 4206, Argentina

10  
11  
12  
13           **Running Title:** *Electrical potentials of protoscoleces from Echinococcus granulosus*

14  
15  
16  
17           **\*Corresponding author:**

18           Email: hcantiello@yahoo.com.ar

19

## 20 **Abstract**

21 Larval stages of the tenia *Echinococcus granulosus* are the infective forms of cystic  
22 echinococcosis or hydatidosis, a worldwide zoonosis. The protoscolex that develops  
23 into the adult form in the definitive host is enveloped by a complex cellular syncytial  
24 tegument, where all metabolic interchange takes place. Little information is available as  
25 to the electrical activity of the parasite in this developmental stage. To gain insight into  
26 the electrical activity of the parasite at the larval stage, here we conducted  
27 microelectrode impalements of bovine lung protoscoleces (PSCs) of *Echinococcus*  
28 *granulosus* in normal saline solution. We observed two distinct intra-parasitic  
29 potentials, a transient peak potential and a stable second potential, most likely  
30 representing tegumental and intra-parasitic extracellular space electrical potential  
31 differences, respectively. These values changed upon the developmental status of the  
32 parasite, its anatomical regions, or time course after harvesting. Changes in electrical  
33 potential differences of the parasite provide an accessible and useful parameter for the  
34 study of transport mechanisms and potential targets for the development of novel  
35 antiparasitic therapeutics.

36

## 37 **Author summary**

38 Hydatid disease is a parasite-caused zoonosis that causes high morbidity and mortality  
39 and has a great impact on public health. The disease has no known cure, and the main  
40 lines of treatment include surgery and medical treatments which are not satisfactory, so  
41 new drug compounds are urgently needed. Genome sequencing of the parasite has  
42 identified different genes encoding ion channels in *Echinococcus granulosus*, making  
43 ion channel inhibitors a promising target for treating hydatidosis. However, no easy

44 technical approaches are available to test the electrical contribution of ion channels to  
45 parasite physiology. In the present study, we used the microelectrode impalement  
46 technique to determine the electrical properties of the larval stages of the parasite  
47 harvested from infected cow lungs. We observed transient electrical potentials not  
48 previously reported for the parasite, and changes in these parameters associated with its  
49 developmental stage and aging. Our findings indicate that microelectrode impalement of  
50 protoscoleces of *Echinococcus granulosus* may be a strategy of choice to explore and  
51 test possible drugs suggested for their therapeutic potential against hydatid disease.  
52 Further evaluation of parasites coming from other animals and humans may help  
53 address important issues in the treatment and prevention of the hydatid disease.

54

## 55 **Introduction**

56 Cystic echinococcosis or hydatidosis encompasses a group of important zoonotic  
57 diseases caused by the metacestode (larval stage) of *Taenia* tapeworms belonging to the  
58 genus *Echinococcus*. The disease is mainly transmitted in livestock-raising areas, and  
59 the two most important zoonotic species of this genus are *E. granulosus* and *E.*  
60 *multilocularis*, causing cystic -or unilocular- echinococcosis (CE) and alveolar -or  
61 multivesicular- echinococcosis (AE), respectively [1, 2]. *E. granulosus* is the most  
62 widespread, with endemic foci in various continents, including South America, the  
63 entire Mediterranean littoral, central Asia, China, Australia, and Africa. In South  
64 America, CE is endemic in Argentina, Uruguay, Brazil, Chile, and some regions of Perú  
65 and Bolivia [3]. In Argentina, this zoonosis spreads through genetically distinct  
66 populations of the parasite [4].

67 *E. granulosus* undergoes a developmental cycle where sexual development of the adult  
68 stage occurs in the small intestine of dogs. Excreted eggs (larval stage) undergo

69 embryonic development into oncospheres that scatter to the environment by fecal  
70 deposition. The cycle continues after ingestion of oncospheres by intermediate hosts,  
71 including humans. The embryos that hatch from the eggs penetrate the intestinal mucosa  
72 and distribute to the liver or other organs, undergoing metamorphosis into the next  
73 larval stage, the metacestode [3]. Closing the life-cycle, the metacestode is eventually  
74 ingested by a definitive host (mostly dog) to develop into a segmented and sexually  
75 mature adult stage again [5].

76 Metacestodes constitute fluid-filled cysts with an inner thin germinal layer where large  
77 numbers of protoscoleces (PSCs) are formed by asexual multiplication. The germinal  
78 layer invaginates to form vesicles and brood capsules [6]. PSCs remain invaginated  
79 within the mucopolysaccharide-coated basal region of the protoscoleces tegument  
80 (invaginated PSC) to protect the scolex until evagination in the definitive host  
81 (evaginated PSC). The precise stimulation for parasite evagination remains unknown,  
82 but environmental changes such as variations in temperature and osmotic pressure may  
83 be among the determining factors [6, 7].

84 Like other cestodes, *E. granulosus* lacks a digestive system, such that the parasite  
85 absorbs water, salts, and nutrients through the external tegument [8]. Thus, the study of  
86 the functional properties of the syncytial tegument is necessary for understanding host-  
87 parasite interactions. However, little information is available about the physiological  
88 differences between the invagination/evagination processes in protoscoleces (PSCs) of  
89 *E. granulosus*. Electrophysiological techniques are useful in the assessment of the  
90 electrical properties of PSCs and can help in the understanding of electrolyte transport  
91 by the tegumental epithelium. Microelectrode recordings have previously been used to  
92 characterize tegumental potential differences (PD) of *Schistosoma mansoni* [9] and the  
93 tegumental potential differences (PD) of ovine strain *E. granulosus* [8], where

94 significant changes were observed upon immunological and chemical manipulations  
95 [10, 11].

96 Here we used microelectrode recordings from PSCs of *E. granulosus* from lungs of  
97 bovine origin to obtain parasitic potential differences (PD). Two distinct parasitic PD,  
98 transient and stable trans-tegumental PD, were recorded from both invaginated and  
99 evaginated PSCs. Data provide, to our knowledge, the first evidence for electrical  
100 potential differences from bovine strain *E. granulosus* that showed significant  
101 differences with previously reported *E. granulosus* from the ovine strain [8]. These  
102 results may help understand the molecular mechanisms associated with ion transport  
103 and hydroelectrolytic balance into the parasite.

104

## 105 **Materials & Methods**

### 106 **Parasites**

107 Protoscoleces of *Echinococcus granulosus* were obtained from hydatid cysts of  
108 naturally infected cattle lungs from a local abattoir. The parasites were collected and  
109 washed as originally described [12] and resuspended in PBS (pH 7.4) supplemented  
110 with penicillin (100 units/ml), streptomycin (100 µg/ml), and amphotericin (0.25  
111 µg/ml). The PSCs were kept at 4°C and used up to one month after harvesting. Viability  
112 was evaluated based on both the methylene blue exclusion method and microscope  
113 examination (10X) of body movements.

114

### 115 **Saline solutions**

116 PSCs were incubated in Ringer Krebs Solution (RKS) containing 121 mM NaCl, 5 mM  
117 KCl, 22.5 mM MgCl<sub>2</sub>, 2.5 mM CaCl<sub>2</sub>, 10 mM Hepes and 5.6 mM glucose, pH 7.4. All  
118 other constituents, osmolarity, and pH were preserved.

119

## 120 ***In vitro* incubation procedures**

121 Parasites were stored at 4°C in PBS (supplemented with antibiotics and antimycotics)  
122 and immediately before the impalement, PSCs were washed and preincubated for 2 h at  
123 37°C in fresh RKS without antibiotics.

124

## 125 **Electrophysiology**

126 Electrical recordings were conducted with a single microelectrode high input impedance  
127 ( $>10^{11}$  Ω) amplifier-intracellular electrometer (Model IE-210, Warner Instruments,  
128 Hamden, CT) with an internal 4-Pole low-pass Bessel filter set at 20 kHz and sampling  
129 rate at 10 kHz. The electrometer was connected in parallel to an Analog-Digital  
130 Converter (TL-1 interface. Tecmar, Solon, OH) that fed the digital input of a personal  
131 computer running Axograph (Axon Instruments, Union City, CA, USA) as a digital  
132 oscilloscope.

133

## 134 **Microelectrode recordings**

135 Microelectrodes from glass capillaries (Biocap, Buenos Aires, Argentina) with 1.25 mm  
136 internal diameter were pulled on a PB-7 pipette puller and heat-polished on an MF-9  
137 pipette polisher (Narishige, Tokyo, Japan), and filled with filtered 3 M KCl solution.  
138 Tip resistance ranged between 10 and 40 MΩ. The reference electrode was a wider tip  
139 glass capillary, also filled with 3 M KCl solution, connected to Cl<sup>-</sup>-plated silver wire

140 (Ag/AgCl) and to the ground socket of the electrometer. The recording chamber  
141 consisted of a glass slide where an aliquot (500  $\mu$ l) of a protoscolex suspension was  
142 added (~100 PSCs/ml). Parasites were impaled after being individually captured and  
143 held with a suction micropipette (Fig. 1c). Impalements were performed under optical  
144 microscopy with an IMT2 Olympus inverted microscope (x10). All impalements were  
145 performed at room temperature after PSC incubation at 37°C. The criteria for acceptable  
146 impalement included: (1) a sharp deflection to a peak potential after electrode  
147 penetration into the PSC; and (2) an abrupt return to the original baseline (0 mV) after  
148 removal from the parasite.

149

## 150 **Data analyses**

151 Data analysis was conducted with Clampfit 10.7 (Axon Instruments). Sigmaplot 11.0  
152 (Jandel Scientific, Corte Madera, CA) was used for statistical analysis and graphics.  
153 Unless otherwise indicated, only values from animals up to 6 days post-harvest were  
154 considered for statistical analyses due to significant changes in tegumental voltages  
155 afterward. Normal distributions of data were examined using the Shapiro-Wilk W test  
156 for normality where  $p < 0.05$  indicated a significant departure from normality. Upon  
157 failure of the Shapiro-Wilk W test, the Box-Cox normality plot was performed to  
158 transform data for normalization [13]. Correlation between potential differences (PD)  
159 was performed by the linear regression model, testing the resultant equation against the  
160 null hypothesis of a slope equal to zero, considering a  $p < 0.05$ . Student t-test and one-  
161 way ANOVA were used to determine statistical significance between different  
162 experimental groups. Averages of corrected data values were expressed as the mean  $\pm$   
163 SEM for each experimental condition per number of ( $n$ ) or per number of PSCs ( $N$ ).

164

## 165 Results

### 166 Microelectrode recordings of protoscolexes

167 The electrical behavior of bovine lung PSCs was explored by microelectrode  
168 impalement as previously reported for *Schistosoma mansoni* [9, 14-16] and PSCs of *E.*  
169 *granulosus* of ovine origin [8]. Both invaginated and spontaneously evaginated PSCs  
170 were impaled. Upon microelectrode penetration of the **tegumental surface (Fig. 1c)** a  
171 **rapid negative transient deflection in electrical potential was always recorded ( $n =$**   
172 **135, Fig. 1D)**, which we referred to as “peak” or potential difference 1 ( $PD_1$ ).

173

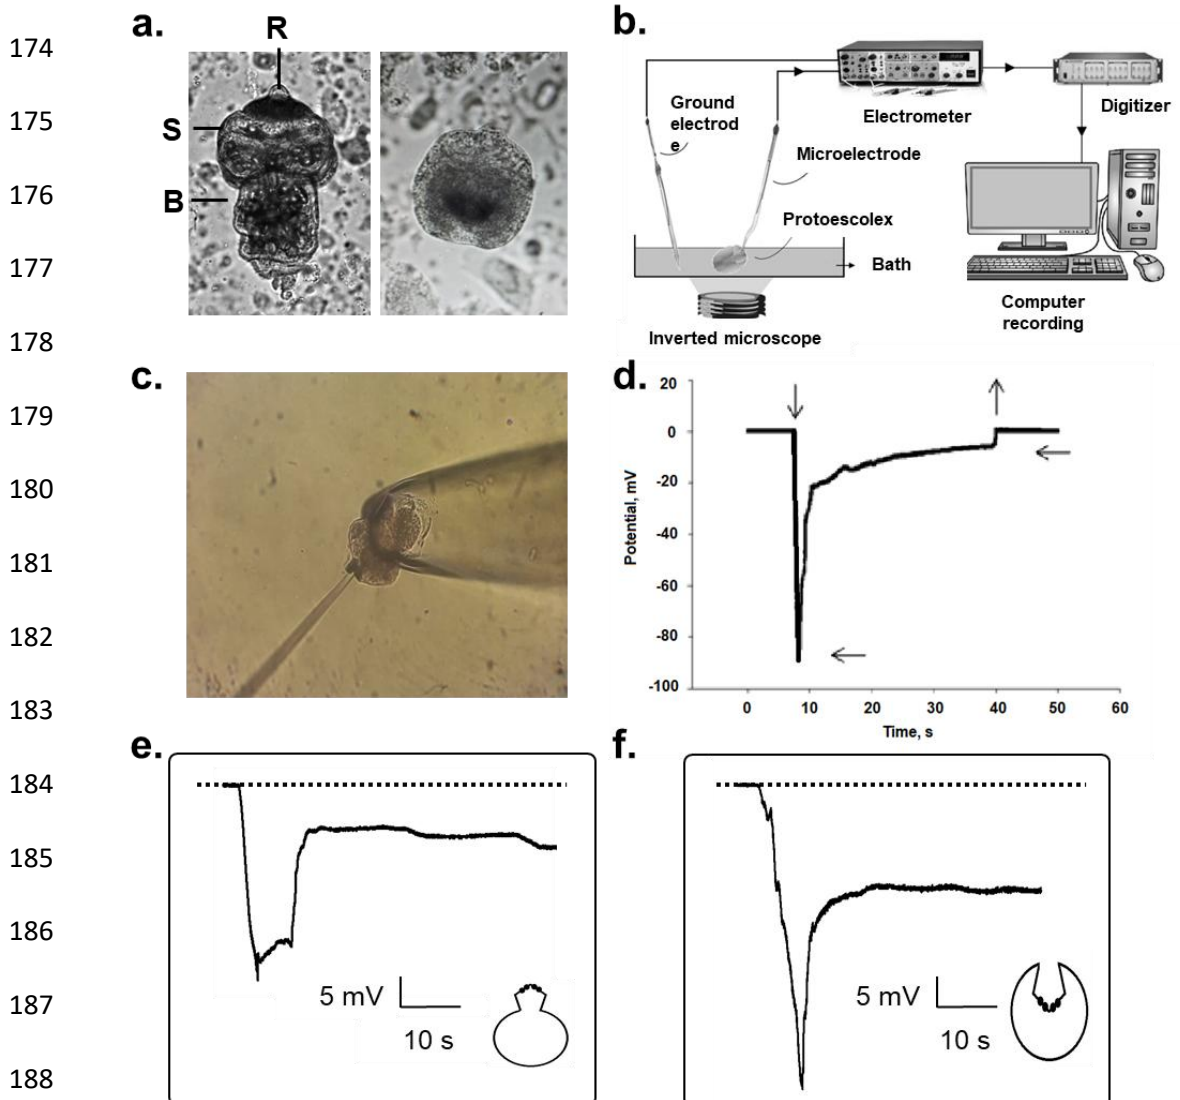



189 **Fig. 1: Electrical microelectrode recordings of PSCs from *E. granulosus*.** (a) Left: Evaginated PSC;  
190 R= Rostellum, S= Sucker, B= Body; Right: Invaginated PSC. (b) Electrical setup. Both ground and  
191 impaling microelectrodes were connected to an electrometer and recorded through an A/D system to a  
192 personal computer. (c) Evaginated PSC held by a suction pipette and impaled with a recording  
193 microelectrode (shown on Left). (d) Representative recording of an invaginated PSC shows deflections  
194 upon impalement (downward vertical arrow) and withdrawal (upward vertical arrow). A typical tracing  
195 shows transient (peak,  $PD_1$ ) and more stable lower (plateau,  $PD_2$ ) potentials. Horizontal arrows indicate  
196 recorded values for  $PD_1$  and  $PD_2$ , respectively. (e) Example of the tegumental potential of invaginated  
197 PSC. (f) Example of the tegumental potential of evaginated PSC. Dashed lines represent 0 mV. Please  
198 note that no upward deflections after withdrawal of microelectrode are indicated.

199

200 This transient potential always spontaneously decayed to another lower, referred to as  
201 “plateau” potential ( $PD_2$ ), even when the microelectrode was not advanced more deeply  
202 into the parasite. Both  $PD_1$  and  $PD_2$  were always discernible and observed in either  
203 invaginated or evaginated parasites. Although impalements for either invaginated or  
204 evaginated PSCs were always conducted under similar conditions, raw values did not  
205 follow a Normal distribution (Fig. 2). Thus, group values (either invaginated or  
206 evaginated PSCs) were transformed by the Box-Cox algorithm [13], to allow  
207 quantitative comparisons. Relative to the bath (0 mV), the  $PD_1$  values for invaginated  
208 PSCs ranged between -179.4 and -14.4 mV with a mean of  $-64.8 \pm 1.4$  mV ( $n = 49$ ).  
209 The  $PD_2$  values for the same group ranged from -88.4 to -6 mV, with a mean value of -  
210  $23.2 \pm 0.3$  mV ( $n = 49$ ), thus representing a  $\Delta PD$  ( $PD_1 - PD_2$ ) of -41.6 mV (Table 1).  
211 Evaginated parasites instead, had  $PD_1$  values that ranged from -231.3 to -20.7 mV with  
212 a mean of  $-92.9 \pm 0.5$  mV ( $n = 86$ ). These potentials shifted to a  $PD_2$  value that ranged  
213 between -77.5 mV and -23.6 mV, with a mean value of  $-33.5 \pm 1.8$  mV ( $n = 86$ ),  
214 representing a  $\Delta PD$  ( $PD_1 - PD_2$ ) of -59.4 mV (Table 1). Thus, mean  $PD_1$  and  $PD_2$   
215 values were statistically different among groups, indicating different tegumental

216 electrical properties ( $p \leq 0.05$ ; Table 1). The  $\Delta PD$  values were also statistically different  
 217 among groups (Table 1), being more negative in the evaginated state ( $p < 0.0001$ ).

### Invaginated PSCs

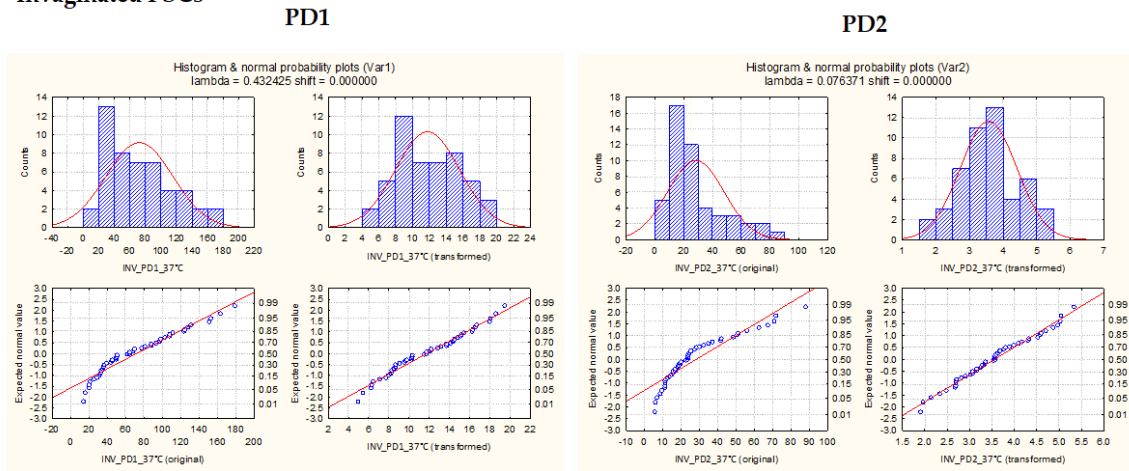

### Evaginated PSCs

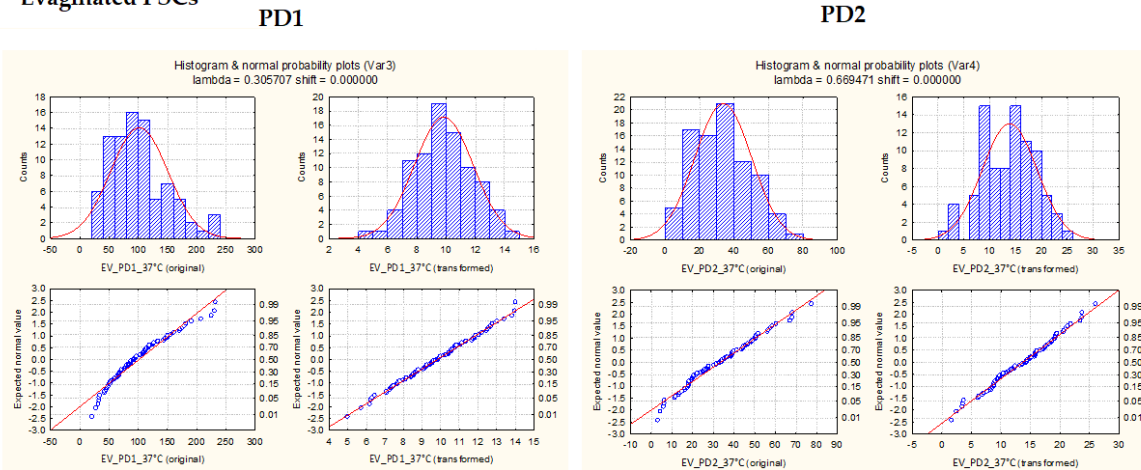

218 **Fig. 2: Tegmental potential data distributions.** Recordings of PSCs from *E. granulosus*. Left panels  
 219 indicate  $PD_1$  values and right panels  $PD_2$  values, for invaginated (Top panels,  $n = 49$  values) and  
 220 evaginated PSCs (Bottom panels,  $n = 86$  values), respectively. Values (mV) are expressed as the mean  $\pm$   
 221 SEM for peak ( $PD_1$ ) and plateau ( $PD_2$ ), respectively.

222

223

**Table 1. Tegmental potentials of PSCs from *E. granulosus*.**

| <i>Dev stage</i>   | $PD_1$                       | $PD_2$                       | $\Delta PD$ | <i>p value</i> |
|--------------------|------------------------------|------------------------------|-------------|----------------|
| <i>Invaginated</i> | $-64.8 \pm 1.4$ ( $n = 49$ ) | $-23.2 \pm 0.3$ ( $n = 49$ ) | 41.6        | $< 0.001$      |
| <i>Evaginated</i>  | $-92.9 \pm 0.5$ ( $n = 86$ ) | $-33.5 \pm 1.8$ ( $n = 86$ ) | 59.4        | $< 0.001$      |

224

225 To explore whether impaling itself modified the PD values by either tissue damage or  
226 KCl leakage from the pipette, multiple sequential measurements (five events/organism)  
227 were also conducted in individual PSCs. For invaginated PSCs, mean  $PD_1$  values were -  
228  $79.3 \text{ mV} \pm 11.5$  ( $N = 15$ ) that decayed to a mean  $PD_2$  value of  $-32.6 \text{ mV} \pm 4.9$  ( $N = 15$ ).  
229 For evaginated PSCs,  $PD_1$  was  $-93.1 \text{ mV} \pm 14.3$  ( $N = 30$ ) that decayed to a  $PD_2$  value of  
230  $-35.3 \text{ mV} \pm 7.2$  ( $N = 30$ ). Thus, mean individual values did not differ significantly from  
231 those obtained from a large number of individual measurements ( $p > 0.05$ ; Table 1), and  
232 therefore impalement itself did not contribute to the transient peaks ( $PD_1$ ), nor affected  
233 the  $\Delta PD$  values observed in either developmental stage of the parasite.

234

## 235 **Time response of the impalements**

236 Because of the different enfolding in the tegumental epithelium between the invaginated  
237 and evaginated parasites, the time taken for full peak polarization after impalement was  
238 also compared between groups. Depolarizations lasted between 100 and 1000  
239 milliseconds, with slopes of  $-3.7 \pm 0.02 \text{ mV/sec}$  ( $n = 8$ ), and  $-10.3 \pm 0.13 \text{ mV/sec}$  ( $n =$   
240  $5$ ) for invaginated and evaginated PSCs, respectively. Thus, the change in potential at  
241 impalement was three times faster in evaginated PSCs ( $p < 0.001$ ). The  $PD_1$  and  $PD_2$   
242 potentials were well defined and statistically different within and among groups, as  
243 determined in both invaginated and evaginated PSCs ( $p < 0.001$ , Table 1). However,  
244 microelectrode recordings were statistically higher in evaginated PSCs than invaginated  
245 PSCs, representing a  $\Delta PD_1$  of almost 30 mV, and  $\Delta PD_2$  of only 10 mV ( $p < 0.05$ , Table  
246 1). To explore whether the developmental stage of evagination affected this interaction,  
247 the correlation between  $PD_1$  and  $PD_2$  was also determined in either stage (Fig. 3c and  
248 3d). A statistically significant correlation was observed between the magnitude of the  
249 tegumental and intra-parasitic potentials ( $r > 0.5$ ), with a slope of  $0.199 \pm 0.029$  ( $n = 49$ )

250 and  $0.266 \pm 0.054$  ( $n = 86$ ) for invaginated and evaginated PSCs, respectively.  
251 However, the correlations were not significantly different among groups, suggesting  
252 electrical continuity between the functional compartments in both invaginated and  
253 evaginated PSCs.

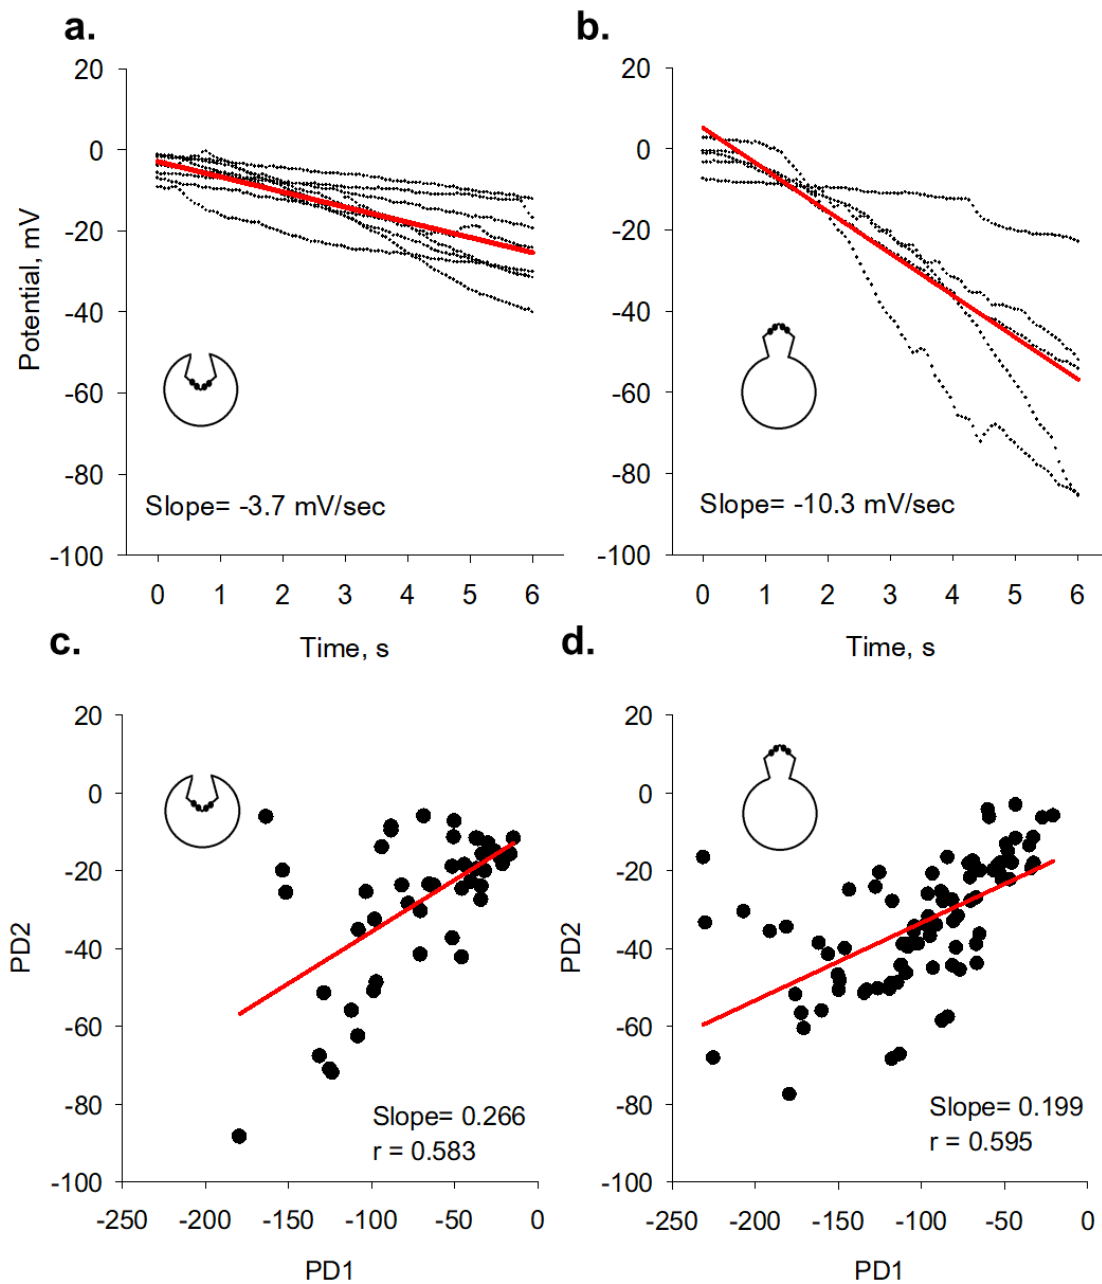

254 **Fig. 3: Time-course of impalement and correlations between PD<sub>1</sub> and PD<sub>2</sub>.** Impalements were carried  
255 out at 37°C in RKS, for both invaginated and evaginated PSCs (Left and Right panels, respectively).  
256 Solid red lines indicate the best linear fitting of time deflections (shown as dotted lines) under each

257 condition. Plots (a) & (b) show slopes in mV/sec as shown at bottom. Plots (c) & (d) show the correlation  
258 between PD<sub>1</sub> (mV) and PD<sub>2</sub> (mV), for invaginated and evaginated PSCs, respectively.

259

## 260 Effect of aging on the tegumental potentials

261 Electrical recordings varied through time post-harvesting and decreased significantly  
262 after the sixth day for invaginated PSCs and after the twelfth day for evaginated PSCs  
263 (Fig. 4). Therefore, mean values were considered from measurements conducted up to a  
264 week after collection from hydatid cysts.

265

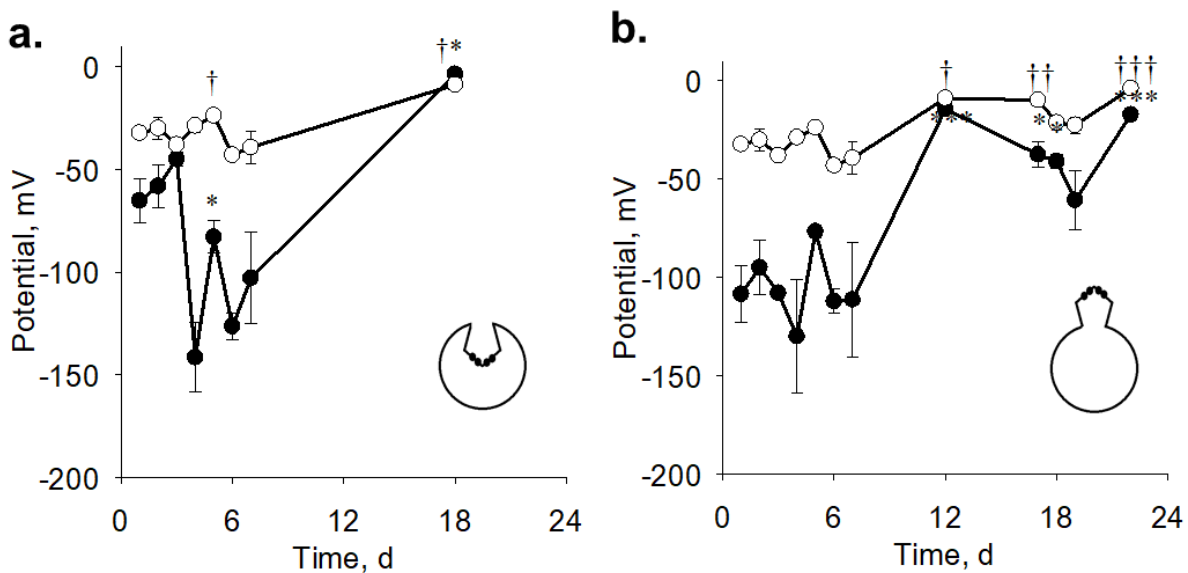

266 **Fig. 4. Effect of aging on the electrical potentials of PSCs from *E. granulosus*.** Graphs show parasitic  
267 potentials at different times post-harvest in days (d) from invaginated (a) and evaginated PSCs (b),  
268 respectively. Filled symbols correspond to PD<sub>1</sub> and open symbols to PD<sub>2</sub>. Values are the mean  $\pm$  SEM,  
269 for  $n$  between 3 and 56. Symbols † or \* indicate statistically significant difference from day 1 (PSCs  
270 harvesting) for PD<sub>1</sub> or PD<sub>2</sub> respectively, with † $p$  < 0.05, †† $p$  < 0.01, ††† $p$  < 0.001 and \* $p$  < 0.05, \*\*\* $p$  <  
271 0.001.

272

## 273 Parasitic potentials in identified anatomical regions of

## 274 evaginated PSCs

275 While invaginated PSCs may be expected to represent a single parasitic compartment,  
276 evaginated parasites may offer distinct and well-defined anatomical regions [17, 18].  
277 Because similar correlations were observed between  $PD_1$  and  $PD_2$  in both populations  
278 (Fig. 3c and 3d) we also explored whether the process of evagination exposed a  
279 particular electrical compartment not defined in the invaginated state. For this,  
280 recordings were obtained from the three identifiable anatomical regions of evaginated  
281 PSCs [17, 18] including the rostellum, the sucker, and body regions of the parasite (Fig.  
282 1a).  $PD_1$  and  $PD_2$  remained different among regions, with  $\Delta PD$  in the 36.8 to 50.7 mV  
283 range (Table 2). The trans-tegumental potential ( $PD_1$ ) obtained from the rostellum was  
284 significantly higher than that from either the neck or body of the evaginated PSC (Table  
285 2). Even, intra-parasitic potential ( $PD_2$ ) showed significant statistical differences among  
286 the three anatomical regions, suggesting the distinct compartmental distribution of  
287 potential throughout the parasite.

288

289 **Table 2. Tegumental potentials from different anatomical regions of evaginated PSCs.**

|                         | <i>n</i> | <i>PD1</i>        | <i>PD2</i>        | $\Delta PD$ | <i>p value</i> |
|-------------------------|----------|-------------------|-------------------|-------------|----------------|
| <b><i>Rostellum</i></b> | 20       | $-81.5 \pm 1.4^a$ | $-30.8 \pm 0.8^a$ | 50.7        | < 0.001        |
| <b><i>Sucker</i></b>    | 64       | $-65.9 \pm 2.2^b$ | $-27.4 \pm 0.7^b$ | 38.5        | < 0.001        |
| <b><i>Body</i></b>      | 42       | $-60.4 \pm 1.8^b$ | $-23.6 \pm 0.7^c$ | 36.8        | < 0.001        |

290 Mean  $\pm$  SEM followed by the same letter in each column were not significantly different from each other

291 (Tukey's test,  $p < 0.01$ ).

292

## 293 Discussion

294 The present study provides, to our knowledge, the first reported characterization of the  
295 tegumental electrical properties of PSCs of *Echinococcus granulosus* from bovine lung.

296 The values and electrical features were different from those reported for PSCs of

297 *Echinococcus granulosus* from the ovine strain [8] and interestingly were more similar  
298 to those of *Schistosoma mansoni* [9]. We observed that upon penetration of the  
299 tegumental surface of the PSC, the first peak of negative potential ( $PD_1$ ) was recorded  
300 that was lower in invaginated PSCs as compared to evaginated PSCs. The  $PD_1$  values  
301 were independent of the duration or depth of the impalement, and spontaneously  
302 decayed to a lower plateau value ( $PD_2$ ), which remained stable and, in all cases was  
303 lower in invaginated PSCs.

304 Because the syncytial tegument of *E. granulosus* is very thin, 2 to 3  $\mu\text{m}$  wide [19], and  
305 despite the actual location of the impaled microelectrode was not ascertained, the first  
306 peak voltage deflection ( $PD_1$ ) should correspond to the trans-tegumental potential, in  
307 agreement with previous reports of ovine PSCs of *E. granulosus* [8], and *Schistosoma*  
308 *mansoni* [9, 20]. Elimination of the tegument by addition of either deoxycholate or  
309 Triton X-100 always elicited a rapid and irreversible depolarization of this particular  
310 electrical potential difference. Moreover, it was demonstrated by iontophoretic injection  
311 of horseradish peroxidase into *S. mansoni* that  $PD_1$  originated in the tegumental  
312 epithelium [20]. The second potential observed in that study, which is similar to  $PD_2$   
313 obtained in the present report, was ascribed to muscle masses below the tegumental  
314 membrane [9, 20]. This is also in agreement with electrophysiological studies  
315 describing the degree of electrical coupling between tegument and muscle of *S.*  
316 *mansoni*, were presented by Thompson et al [16].

317 Aging is another parameter that may bring information regarding the location of  $PD_1$   
318 and  $PD_2$ . Ibarra and Reisin [8] reported that under control conditions, *E. granulosus*  
319 PSCs from ovine origin remained stable up to 25 days. However, the present study on  
320 PSCs from bovine lung origin showed a significant decrease in  $PD_1$  after 6 days post-



321 harvest, as compared to  $PD_2$ . On the other hand, no invaginated PSCs could be found  
322 after 20 days post-harvest, because gradual development into the evaginated stage.

323 The reason(s) for the differences between the shape and magnitude of the PDs in ours  
324 and Ibarra and Reisin [8] could span from technical details of the electrical recordings to  
325 the origin and species of the PSCs, including the *E. granulosus* genotypes. Further  
326 experimentation will be required to ascertain the nature of these changes.

327 The present study indicates that although the general properties of the syncytial  
328 tegument may remain the same in different developmental stages of the parasite, the  
329 speed of depolarization at impalement and  $PD_1$  and  $PD_2$  values were statistically higher  
330 in the evaginated stage as compared to the invaginated stage of the parasite. Thus, it is  
331 possible that the invaginated parasite could provide a second electrical barrier that is  
332 eliminated upon evagination. However, the magnitude of  $PD_1$  and  $PD_2$  were similarly  
333 correlated in both developmental stages, an indication that the electrical compartments  
334 remained identically coupled.

335 Previous studies have not reported on the tegumental potentials of the evaginated stage  
336 of the PSC from *Echinococcus granulosus*. The electrical data of the anatomical regions  
337 of the evaginated parasite obtained in the present study further suggest that different  
338 parts may provide specific contributions to the invaginated stage, where the anatomical  
339 regions such as the rostellum and the neck are intra-parasitic. Moreover, different  
340 tegumental potentials have been reported in anatomical regions of *Schistosoma* [16].

341 Little is known as to the electrodiffusional pathways that contribute to the electrical  
342 potential differences in *Echinococcus* and other flatworms. Cantiello, Ibarra & Reisin  
343 [21] observed that the passive  $K^+$  influx corresponded to a simple diffusional  
344 mechanism distributed in at least two compartments, one small and faster and the other  
345 large and slower ionic exchange, although no anatomical correlates of the parasite were



346 reported. The ion channel species responsible for these movements have yet to be  
347 identified, as well as their contribution to the electrophysiology of the parasite.  
348 Grosman and Reisin provided preliminary evidence for the presence of cation-selective  
349 channels in extracted membranes of *E. granulosus* PSCs from ovine origin [22, 23]. The  
350 recent genomic sequencing of *E. granulosus* and other cestodes [6, 24] may help  
351 identify the molecular fingerprints of the channel and transporter species, and assess  
352 their relevance as possible pharmacological targets [25]. To date, useful antiparasitic  
353 drugs include potential  $\text{Ca}^{2+}$  channel blockers such as praziquantel [26, 27], and  
354 benzimidazoles, such as mebendazole and albendazole, that modify the microtubular  
355 cytoskeleton [28]. New ion channel targets and relevant interactions could be expected  
356 to bring about novel therapeutic strategies [29-31]. We recently obtained preliminary  
357 information to suggest that known links between excitable cation channels and the actin  
358 cytoskeleton [32] may help potentiate the ability of praziquantel to paralyze the  
359 *Echinococcus granulosus* PSCs [33].

360 In summary, the present study provides evidence that PSCs of *Echinococcus granulosus*  
361 from the bovine strain present complex tegumental potentials remarkably differ from  
362 those previously reported for a similar preparation from sheep origin. Two distinct  
363 functional compartments were identified of tegumental origin and extracellular domain  
364 of the intra-parasitic milieu, respectively. Future studies will be required to assess the  
365 nature of the differences, genetic or otherwise from those reported with ovine *E.*  
366 *granulosus*, and those expected from other intermediary species. The microelectrode  
367 measurements of parasitic potentials may prove an invaluable tool in helping  
368 characterize the contribution of various ion channel species and enzymatic transporters  
369 in cestodes, and also provide a rapid testing approach to explore and identify new  
370 pharmacological targets.

371

## 372 **Acknowledgments**

373 The authors wish to acknowledge the National Research Council of Argentina  
374 (CONICET) for funding of the present study (PUE 2292180100054CO).

375

## 376 **Author Contributions**

377 **Conceptualization:** Horacio F. Cantiello

378 **Data curation:** Mónica P. A. Carabajal, Marcos A. Durán, Santiago Olivera

379 **Resources:** Santiago Olivera, María José Fernández Salom

380 **Formal analysis:** Mónica P. A. Carabajal, Horacio F. Cantiello

381 **Funding acquisition:** Horacio F. Cantiello

382 **Supervision:** Horacio F. Cantiello

383 **Investigation:** Horacio F. Cantiello, Mónica P. A. Carabajal, Marcos A. Durán,  
384 Santiago Olivera, María José Fernández Salom

385 **Writing – original draft:** Horacio F. Cantiello, Mónica P. A. Carabajal

386 **Writing – review & editing:** Horacio F. Cantiello

387

## 388 **References**

389 1. Eckert J, Deplazes P. Biological, epidemiological, and clinical aspects of  
390 echinococcosis, a zoonosis of increasing concern. Clin Microbiol Rev. 2004; 17(1):107-

391 35. <https://doi.org/10.1128/CMR.17.1.107-135.2004> PMID: [14726458](https://pubmed.ncbi.nlm.nih.gov/14726458/)

392 2. Thompson R, Lymbery A. The nature, extent and significance of variation  
393 within the genus *Echinococcus*. Adv Parasitol. 1988;27:209-58.

394 [https://doi.org/10.1016/S0065-308X\(08\)60356-5](https://doi.org/10.1016/S0065-308X(08)60356-5)

- 395 3. Moro P, Schantz PM. Echinococcosis: a review. Intl J Infect Dis.  
396 2009;13(2):125-33. <https://doi.org/10.1016/j.ijid.2008.03.037>
- 397 4. Kamenetzky L, Gutierrez AM, Canova SG, Haag KL, Guarnera EA, Parra A, et  
398 al. Several strains of *Echinococcus granulosus* infect livestock and humans in  
399 Argentina. Infect Genet Evol. 2002;2(2):129-36. [https://doi.org/10.1016/S1567-](https://doi.org/10.1016/S1567-1348(02)00131-4)  
400 [1348\(02\)00131-4](https://doi.org/10.1016/S1567-1348(02)00131-4)
- 401 5. Camargo de Lima J, Monteiro KM, Basika Cabrera TN, Paludo GP, Moura H,  
402 Barr JR, et al. Comparative proteomics of the larval and adult stages of the model  
403 cestode parasite *Mesocestoides corti*. J Proteom. 2018;175:127-35.  
404 <https://doi.org/10.1016/j.jprot.2017.12.022>
- 405 6. Koziol U, Brehm K. Recent advances in *Echinococcus genomics* and stem cell  
406 research. Vet Parasitol. 2015;213(3-4):92-102.  
407 <https://doi.org/10.1016/j.vetpar.2015.07.031>
- 408 7. Thompson R. Chapter Two - Biology and Systematics of Echinococcus. In:  
409 Thompson RCA DP, Lymbery AJ (Eds.), editor. Advances in Parasitology Academic  
410 Press; 2017. p. 65-109. <https://doi.org/10.1016/bs.apar.2016.07.001>
- 411 8. Ibarra C, Reisin IL. *Echinococcus granulosus*: Characterization of the electrical  
412 potential of the syncytial tegument of protoscoleces incubated *in vitro*-effect of  
413 inhibitors. Exp Parasitol. 1994;78(4):400-9. <https://doi.org/10.1006/expr.1994.1044>
- 414 9. Fetterer R, Pax R, Bennett J. *Schistosoma mansoni*: Characterization of the  
415 electrical potential from the tegument of adult males. Exp Parasitol. 1980;49(3):353-65.  
416 [https://doi.org/10.1016/0014-4894\(80\)90071-5](https://doi.org/10.1016/0014-4894(80)90071-5)
- 417 10. Reisin IL IC, Cybel B, Rotunno CA, Cantiello HF. Mecanismos de acción del  
418 mebendazol sobre el *Echinococcus granulosus* en su estadio larval estudiado *in vitro*.

- 419 Bases para la interpretación de los resultados de la quimioterapia experimental y clínica  
420 Arch Intl Hidatidosis XXVIII. 1988:442-70.
- 421 11. Ferreira A, Trecu T, Reisin I. *Echinococcus granulosus*: study of the *in vitro*  
422 complement activation by protoscolecocytes by measuring the electric potential difference  
423 across the tegumental membrane. Exp parasitol. 1992;75(3):259-68.  
424 [https://doi.org/10.1016/0014-4894\(92\)90211-R](https://doi.org/10.1016/0014-4894(92)90211-R)
- 425 12. Reisin I, Rabito C, Cantiello H. Water and electrolyte balance in protoscolecocytes  
426 of *Echinococcus granulosus* incubated *in vitro*: Effect of metabolic inhibitors. Intl J  
427 Parasitol. 1981;11(5):405-10. [https://doi.org/10.1016/0020-7519\(81\)90013-8](https://doi.org/10.1016/0020-7519(81)90013-8)
- 428 13. Box G, Cox D. An analysis of transformation. J Royal Stat Soc, Series B  
429 (Methodological). 1964;26(2):211-52.  
430 <https://doi.org/10.1111/j.25176161.1964.tb00553.x>
- 431 14. Fetterer RH, Pax RA, Bennett JL. *Schistosoma mansoni*: Direct method for  
432 simultaneous recording of electrical and motor activity. Exp Parasitol. 1977;43(1):286-  
433 94. [https://doi.org/10.1016/0014-4894\(77\)90033-9](https://doi.org/10.1016/0014-4894(77)90033-9)
- 434 15. Fetterer R, Pax R, Bennett J. Na<sup>+</sup>-K<sup>+</sup> transport, motility and tegumental  
435 membrane potential in adult male *Schistosoma mansoni*. Parasitology. 1981;82(1):97-  
436 109. <https://doi.org/10.1017/S0031182000041895>
- 437 16. Thompson D, Pax R, Bennett J. Microelectrode studies of the tegument and sub-  
438 tegumental compartments of male *Schistosoma mansoni*: an analysis of  
439 electrophysiological properties. Parasitology. 1982;85(1):163-78.  
440 <https://doi.org/10.1017/S0031182000054238>
- 441 17. Martínez C, Paredes R, Stock R, Saralegui A, Andreu M, Cabezón C, et al.  
442 Cellular organization and appearance of differentiated structures in developing stages of

- 443 the parasitic platyhelminth *Echinococcus granulosus*. J Cell Biochem. 2005;94(2):327-  
444 35. <https://doi.org/10.1002/jcb.20294>
- 445 18. Galindo M, Schadebrodt G, Galanti N. *Echinococcus granulosus*: cellular  
446 territories and morphological regions in mature protoscoleces. Exp Parasitol.  
447 2008;119(4):524-33. <https://doi.org/10.1016/j.exppara.2008.04.013>
- 448 19. Morseth DJ. Fine structure of the hydatid cyst and protoscolex of *Echinococcus*  
449 *granulosus*. J Parasitol. 1967;53:312-25. <https://doi.org/10.2307/3276582>
- 450 20. Bricker CS, Pax R, Bennett J. Microelectrode studies of the tegument and sub-  
451 tegumental compartments of male *Schistosoma mansoni*: anatomical location of sources  
452 of electrical potentials. Parasitology. 1982;85(1):149-61.  
453 <https://doi.org/10.1017/S0031182000054226>
- 454 21. Cantiello H, Ibarra C, Reisin I. Flujos de K<sup>+</sup> y potenciales eléctricos a través de  
455 las membrana de *Echinococcus granulosus* incubado "in vitro". IX Reunión Anual de la  
456 Sociedad Argentina de Biofísica; Bermejo, Mendoza.1980.
- 457 22. Grosman C, Reisin IL. *Echinococcus granulosus*: partial characterization of the  
458 conductive properties of two cation channels from protoscoleces of the ovine strain,  
459 reconstituted on planar lipid bilayers. Exp Parasitol. 1995;81(4):546-55.  
460 <https://doi.org/10.1006/expr.1995.1148>
- 461 23. Grosman C, Reisin I. Interconverting gating modes of a nonselective cation  
462 channel from the tapeworm *Echinococcus granulosus* reconstituted on planar lipid  
463 bilayers. J. Membrane Biol. 1997;158(1):87-94. <https://doi.org/10.1007/s002329900246>
- 464 24. Tsai IJ, Zarowiecki M, Holroyd N, Garcarrubio A, Sanchez-Flores A, Brooks  
465 KL, et al. The genomes of four tapeworm species reveal adaptations to parasitism.  
466 Nature. 2013;496(7443):57-63. <https://doi.org/10.1038/nature12031>

- 467 25. Nor B, Young ND, Korhonen PK, Hall RS, Tan P, Lonie A, et al. Pipeline for  
468 the identification and classification of ion channels in parasitic flatworms. *Parasites*  
469 *Vectors*. 2016;9(1):1-12. <https://doi.org/10.1186/s13071-016-1428-2>
- 470 26. Doenhoff MJ, Cioli D, Utzinger J. Praziquantel: mechanisms of action,  
471 resistance and new derivatives for schistosomiasis. *Curr Opin Infect Dis*.  
472 2008;21(6):659-67. <https://doi.org/10.1097/QCO.0b013e328318978f>
- 473 27. Wu W, Wang W, Huang Y-x. New insight into praziquantel against various  
474 developmental stages of *schistosomes*. *Parasitol Res*. 2011;109(6):1501-7.  
475 <https://doi.org/10.1007/s00436-011-2670-3>
- 476 28. Lacey E. Mode of action of benzimidazoles. *Parasitol Today*. 1990;6(4):112-5.  
477 [https://doi.org/10.1016/0169-4758\(90\)90227-U](https://doi.org/10.1016/0169-4758(90)90227-U)
- 478 29. Prole DL, Taylor CW. Identification of intracellular and plasma membrane  
479 calcium channel homologues in pathogenic parasites. *PloS ONE*. 2011;6(10):e26218.  
480 <https://doi.org/10.1371/journal.pone.0026218>
- 481 30. Jimenez V, Docampo R. Molecular and electrophysiological characterization of  
482 a novel cation channel of *Trypanosoma cruzi*. *PLoS Pathog*. 2012;8(6):e1002750.  
483 <https://doi.org/10.1371/journal.ppat.1002750>
- 484 31. Greenberg RM. Ion channels and drug transporters as targets for anthelmintics.  
485 *Curr Clin Micro Rpt*. 2014;1(3-4):51-60. <https://doi.org/10.1007/s40588-014-0007-6>
- 486 32. Lader AS, Kwiatkowski DJ, Cantiello HF. Role of gelsolin in the actin filament  
487 regulation of cardiac L-type calcium channels. *Am J Physiol*. 1999;277(6):C1277-C83.  
488 <https://doi.org/10.1152/ajpcell.1999.277.6.C1277>
- 489 33. Durán MA, Olivera SR, Cantiello HF. Increase in pharmacological potency of  
490 Praziquantel by cytoskeletal modifiers in protoscolecids of *Echinococcus granulosus*.  
491 XXXIII Jornadas Nacionales de Hidatidosis; Octubre 6; Catamarca, Argentina, 2018.
